## Locus coeruleus integrity preserves memory performance across the adult life span

Martin J. Dahl\*<sup>1</sup>, Mara Mather<sup>2</sup>, Sandra Düzel<sup>1</sup>, Nils C. Bodammer<sup>1</sup>, Ulman Lindenberger<sup>1,3</sup>,  
Simone Kühn<sup>1,4</sup>, & Markus Werkle-Bergner\*<sup>1</sup>

<sup>1</sup>Center for Lifespan Psychology, Max Planck Institute for Human Development, Berlin, Germany

<sup>2</sup>Davis School of Gerontology, University of Southern California, Los Angeles, USA

<sup>3</sup>Max Planck UCL Centre for Computational Psychiatry and Ageing Research, London, England, and Berlin, Germany

<sup>4</sup>Department of Psychiatry and Psychotherapy, University Clinic Hamburg-Eppendorf, Hamburg, Germany

\* Correspondence concerning this manuscript should be addressed to

MJD ([dahl@mpib-berlin.mpg.de](mailto:dahl@mpib-berlin.mpg.de)) or MWB ([werkle@mpib-berlin.mpg.de](mailto:werkle@mpib-berlin.mpg.de))

### Acknowledgements.

This article uses data from the Berlin Aging Study II (BASE-II), which was supported by the German Federal Ministry of Education and Research (Bundesministerium für Bildung und Forschung, BMBF) under grant numbers #16SV5536 K, #16SV5537, #16SV5538, and #16SV5837, #01UW070 and #01UW0808. Additional contributions (e.g., financial, equipment, logistics, personnel) are made from each of the other participating sites, i.e., the Max Planck Institute for Human Development (MPIB), Max Planck Institute for Molecular Genetics (MPIMG), Charité-Universitätsmedizin, University Medicine, German Institute for Economic Research (DIW), Humboldt-Universität zu Berlin, all located in Berlin, Germany, and University of Lübeck in Lübeck, and University of Tübingen, Germany. For further information about the BASE-II project, see <https://www.base2.mpg.de/en>  
MW-B received support from the German Research Foundation (DFG, WE 4269/5-1) and the Jacobs Foundation (Early Career Research Fellowship 2017–2019).

MJD is a fellow of the International Max Planck Research School on the Life Course (LIFE; <http://www.imprs-life.mpg.de/en>). MJD is recipient of a stipend from the Sonnenfeld-Foundation (<http://www.sonnenfeld-stiftung.de/en/>). MM's work was supported by an Alexander von Humboldt fellowship and by National Institutes of Health grant R01AG025340.

We thank Andrew R. Bender, Matthew Betts, and Myriam C. Sander for valuable discussions and assistance. We are grateful to Shelby Bachman and Dilara Zorbek, who performed the manual tracing of the locus coeruleus, as well as Ylva Köhncke and Yana Fandakova for statistical advice, and Michael Krause for help with cluster computing.

## Abstract

For decades, the search for drivers of memory decline in human cognitive aging has focused on neocortical regions, the hippocampus, and dopaminergic neuromodulation. Recent findings indicate that the locus coeruleus (LC) and noradrenergic neuromodulation may also play an important role in shaping memory development in later life. However, technical challenges in non-invasive monitoring of LC integrity have hindered the study of LC-cognition associations in humans so far. Using high-resolution neuromelanin-sensitive magnetic resonance imaging, we found that individual differences in learning and memory were positively associated with LC integrity across a variety of memory tasks in large samples of younger ( $n = 66$ ), and older adults ( $n = 233$ ). Moreover, we observed spatially confined and functionally relevant age differences in rostral LC. Older adults who showed a more youth-like rostral LC also showed higher memory performance. These findings link non-invasive, in vivo indices of LC integrity to memory in human aging and extend our knowledge about the role of the LC norepinephrine system in senescent decline in human cognition.

## *Keywords:*

Neuromodulation, cognitive aging, norepinephrine, locus coeruleus, memory

## Introduction

Memory performance declines with advancing adult age<sup>1</sup>, jeopardizing the everyday competence of older adults<sup>2,3</sup>. Age-associated changes in neocortical regions, the hippocampus, and dopaminergic neuromodulation have been found to contribute to age-related memory impairments<sup>1,4-6</sup>. More recently, findings from animal and post-mortem human research have led researchers to propose that losses in the structural integrity of the locus coeruleus (LC), the brain's primary norepinephrine (NE) source, are critically related to cognitive decline in normal aging and age-related pathologies<sup>7-10</sup>. However, direct in vivo evidence relating LC integrity to interindividual differences in general memory abilities is scarce. While there is an initial indication of a selective role of LC integrity in the encoding of negative emotional events<sup>11</sup>, the relation of LC integrity to memory performance in general is still an open question. Given LC's pivotal role in age-related memory disorders like Alzheimer's disease<sup>8,9,12</sup>, this relationship, however, is of high clinical and scientific importance.

The LC is a hyperpigmented cylindrical cluster of catecholaminergic neurons located in the dorsorostral tegmentum<sup>13</sup>. Roughly symmetrical in both hemispheres, it extends for only about 15 mm rostrocaudally from the level of the inferior colliculi to a position in the lateral wall of the fourth ventricle<sup>14,15</sup>. Despite its small size, the LC has diffuse and highly arborized efferent projections throughout the brain<sup>16</sup>. While initial reports considered the LC a uniform structure, a spatially differentiated organization according to terminal fields is now assumed. Cells giving rise to dense hippocampal projections tend to be located in more rostral segments while those that innervate the cerebellum and spinal cord are located more caudally<sup>17-19</sup>. NE release by the LC modulates cognitive functions such as perception, attention, learning and memory<sup>17,20-28</sup>. In particular, via its action on  $\beta$ -adrenoceptors in the hippocampus, the LC modulates long-term

potentiation (LTP) and long term-depression (LTD), key determinants of synaptic plasticity and memory<sup>29,30</sup>. Recent optogenetic work has confirmed a causal role of LC activity in hippocampal LTP and memory enhancement, potentially via co-release of dopamine<sup>31–33</sup>.

Its location adjacent to the ventricular system and its widespread, unmyelinated projections expose LC cells to blood- and cerebrospinal-fluid bound toxins, making them a likely target for neurodegeneration<sup>34</sup>. Consistent with its age-related vulnerability, a prominent, rostrally accentuated decline of LC density was reported in healthy aging (see Manaye and colleagues<sup>18</sup> for a review of early studies; but see<sup>12,14,35,36</sup> and Mather and Harley<sup>34</sup> for a recent discussion). Based on longitudinal data, Wilson and colleagues<sup>10</sup> reported initial evidence pointing to the importance of LC integrity for maintaining memory abilities in old age. The authors evaluated cognitive abilities in a sample of older adults annually over a mean duration of about six years and, upon the participants' death, assessed LC integrity post mortem via autopsy. Wilson and colleagues<sup>10</sup> observed an attenuation of cognitive decline as well as higher baseline cognitive abilities in individuals with higher LC integrity even after accounting for the integrity of other neuromodulatory systems and markers of neuropathology (i.e., Lewy bodies and neurofibrillary tangles within the brainstem)<sup>10</sup>. Furthermore, studies in aged mice<sup>37</sup>, rats<sup>38</sup>, and monkeys<sup>39</sup> in which NE or its agonists were manipulated indicate that NE plays a causal role in learning and memory.

Non-invasive, in vivo assessments of human LC integrity are notoriously difficult, given the nucleus' small size and location deep in the brainstem<sup>26,40,41</sup>. Fortunately, however, a by-product of catecholamine synthesis, the dark, insoluble pigment neuromelanin, accumulates in the LC across the life span<sup>42</sup>. LC pigmentation increases from birth until late middle age. While some studies observed constant neuromelanin levels in late life<sup>35</sup>, others reported a decline from

midlife until death, probably due to selective atrophy of neuromelanin-containing cells<sup>18,43,44</sup>. In noradrenergic cells, neuromelanin avidly chelates metals such as copper and iron and, as a compound, shows paramagnetic, T<sub>1</sub>-shortening effects<sup>45</sup>. Sasaki and colleagues developed a neuromelanin-sensitive Turbo Spin Echo (TSE) magnetic resonance imaging (MRI) sequence that visualizes the LC as an hyperintense area adjacent to the lateral floor of the fourth ventricle<sup>46</sup> (for a review of neuromelanin-sensitive MRI studies, see Liu and others<sup>47</sup>). Keren and colleagues<sup>48</sup> recently validated this sequence by scanning human post-mortem samples using ultra high field MRI and then performing histological analyses of the samples. Brainstem areas showing hyperintensities on neuromelanin-sensitive scans overlapped closely with noradrenergic cells as identified by histology. Thus, neuromelanin acts as a natural contrast agent that opens the door to the non-invasive, in vivo assessment of LC integrity via MRI.

To determine the importance of structural LC integrity for the maintenance of memory functioning in vivo, we assessed individual differences in learning and memory among younger and older adults with the Rey Auditory Verbal Learning Test (RAVLT), a validated neuropsychological measure of memory functioning. In this context, specifically the analysis of individual learning trajectories, that is, the increase in recall performance across iterative item presentations, conveys valuable information about a participant's current and future cognitive status<sup>49-52</sup>. Using structural equation modeling (SEM) to capture the non-linear dynamics of growth in performance<sup>53</sup>, previous studies have linked aging to lower initial memory performance<sup>54,55</sup> and slower learning with practice<sup>55</sup>. Hence, we hypothesized that the integrity of the LC-NE system as assessed by neuromelanin-sensitive MRI would be closely associated with individual differences in initial memory performance and learning rates. In sum, the goal of this study was to extend our knowledge about the role of the LC-NE system in human cognitive

## LOCUS COERULEUS AND MEMORY IN OLD AGE

6

aging by linking non-invasive, in vivo indices of LC integrity to memory abilities in younger and older adults.

## Results

### Initial recall performance is reduced in older adults

We used latent growth curve modeling<sup>56</sup> to estimate the intercept (i.e., recall performance after the first trial) and the slope (i.e., the rate of learning in the course of additional trials) of younger and older adults' performance in an iterative verbal memory task (see Online methods and Figure 1). A multiple-group model describing the gradually increasing but negatively accelerated performance trajectories as a quadratic growth function fit the data well and outperformed competing alternative models (RMSEA < 0.06; CFI > 0.95<sup>57</sup>; see Supplemental results and lower part of Figure 2). Importantly, the model allows testing of group differences in factors capturing initial recall (intercept) and learning (slope) as well as for interindividual differences therein within each age group.

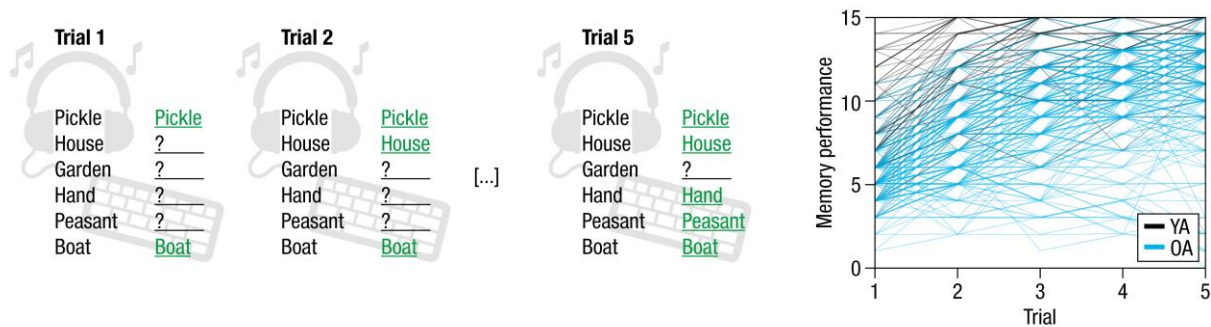

*Figure 1.* Schematic overview of the verbal learning and memory task (left). A word list consisting of 15 unrelated words is auditorily presented to participants over five trials. After each trial, subjects freely recall items and enter their responses via keyboard. Right: Younger (YA; black) and older adults' (OA; blue) performance increases over learning trials in a non-linear fashion.

Both the means and the variances of the intercept and slope factors differed reliably from zero in each age group (means: all  $\Delta\chi^2 \geq 62.602$ ,  $\Delta df = 1$ , all  $p < 0.001$ ; variances: all  $\Delta\chi^2 \geq 11.97$ ,  $\Delta df = 1$ , all  $p < 0.001$ ). As the sole exception, there were no reliable differences in the variance of the quadratic slope factor in younger adults, indicating similar negative acceleration of the growth curve across subjects ( $\Delta\chi^2 = 0.276$ ,  $\Delta df = 1$ ,  $p = 0.599$ ). Performance differences

between younger and older adults were mainly found in intercepts ( $\Delta\chi^2 = 59.533$ ,  $\Delta df = 1$ ,  $p < 0.001$ ; see Supplemental results). In sum, older adults improved their recall performance over trials at similar rates as younger adults did, but started and ended with lower scores.

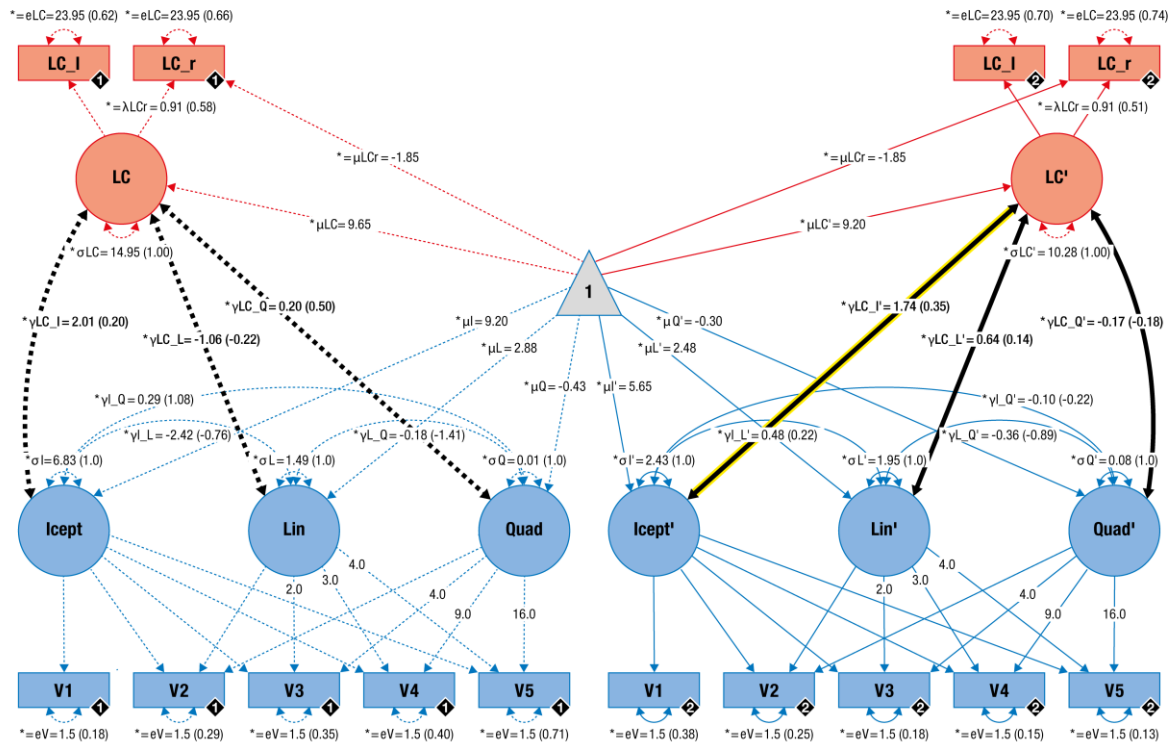

*Figure 2.* Pictorial rendition of the structural equation model that probes associations (thick black lines) between locus coeruleus integrity (LC; red) and memory performance (blue) in younger and older adults on a latent level. Cognitive manifest variables represent the iteratively assessed memory performance in a verbal learning and memory task (V1–5). Neural manifest variables are the LC intensity ratios of each hemisphere (left = LC\_l; right = LC\_r). Black diamonds on manifest variables indicate the age group (younger adults = 1, broken lines; older adults = 2, solid lines). (Co)Variances ( $\gamma$ ,  $\sigma$ ) and loadings ( $\lambda$ ) in brackets indicate standardized estimates. Loadings that are freely estimated (\*) but constrained to be equal across age groups (=) are indicated by both asterisk and equal signs (\*=). Icept = Intercept; Lin/Quad= linear / quadratic slope, respectively. Rectangles and circles indicate manifest and latent variables, respectively. The constant is depicted by a triangle. The significant association between locus coeruleus integrity and memory performance (Icept) in older adults is highlighted (yellow frame).

### Locus coeruleus integrity scores are positively associated with initial recall performance in older adults

We developed a semi-automatic procedure to extract individual LC ratios<sup>47</sup>, that is, a ratio score of peak LC MRI intensity relative to peak intensity in a dorsal pontine reference region,



across the rostrocaudal extent of the nucleus (see Online methods and Figure 3a–c). The procedure evinced high reproducibility across multiple measurements (see Supplemental results) and was validated using both published LC maps (see Figure 3d) and manual intensity assessments (see Supplemental results). In order to relate memory performance to LC integrity, we integrated LC ratios over slices and hemispheres to derive a single measure reflecting LC integrity. In particular, we estimated latent scores for LC integrity by means of a multiple-group single-factor structural equation model based on each hemisphere's mean intensity ratios (see Online methods and upper part of Figure 2). The proposed model fit the data well (RMSEA < 0.06; CFI > 0.95<sup>57</sup>; see Supplemental results). We detected reliable average LC scores for both age groups; moreover, within each group, participants showed significant interindividual differences in LC scores (all  $\Delta\chi^2 \geq 18.305$ ,  $\Delta df = 1$ , all  $p < 0.001$ ; see Supplemental results).

Younger and older adults demonstrated comparable average LC scores ( $\Delta\chi^2 = 0.383$ ,  $\Delta df = 1$ ,  $p = 0.536$ ), in line with spatially confined age differences across the rostrocaudal LC axis<sup>41,58</sup>.

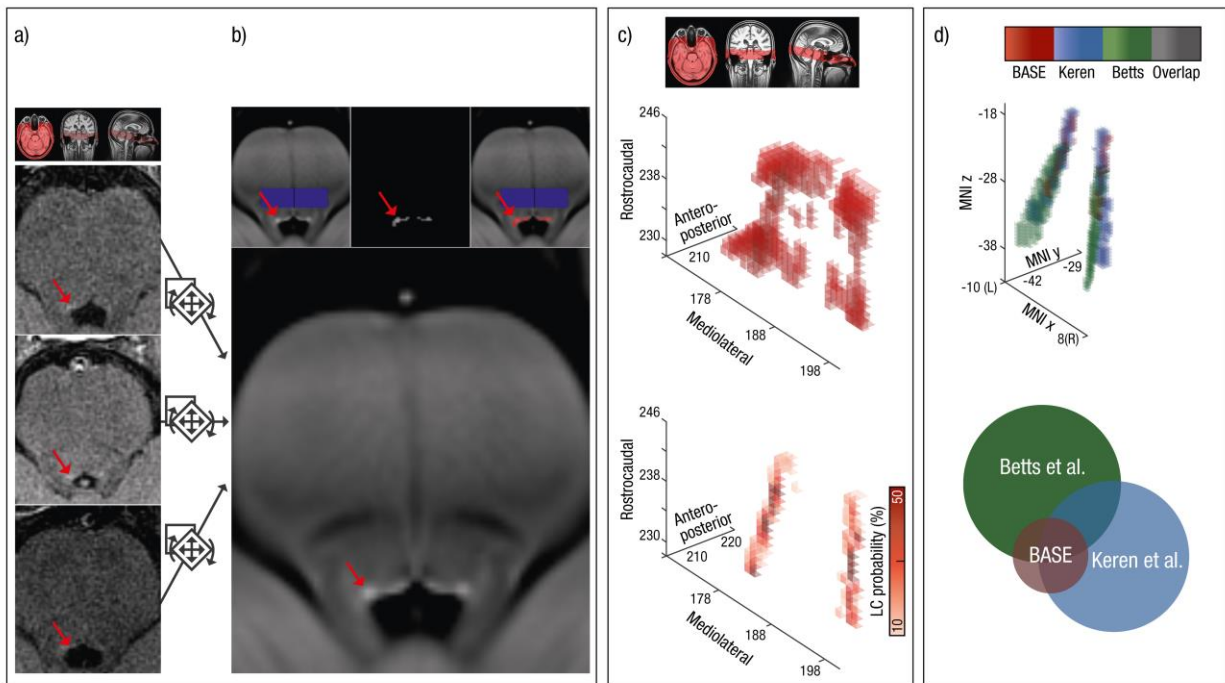

*Figure 3.* Schematic overview of the semi-automatic analysis procedure used to extract individual locus coeruleus (LC) intensity values across the rostrocaudal extent. (a) Native space neuromelanin-sensitive brainstem scans of three randomly selected subjects (axial slices are shown). Hyperintensities corresponding to the LC are indicated by red arrows. (b) Neuromelanin-sensitive scans were aligned and pooled across subjects in order to increase signal-to-noise ratio and facilitate LC delineation using a template-based approach. On a group level, LC location (red) was semi-automatically determined based on an intensity threshold relative to a pontine reference area (blue; see inlays). (c) Areas surviving the thresholding are grouped into a volume of interest (search space: upper plot; 3D representation) and used to restrict automatized extraction of individual peak intensities and their location. Observed peak LC locations were converted to a LC probability map (lower plot). (d) In standard space, the LC probability map was successfully validated using published maps by Keren and colleagues (2009)<sup>41</sup> and Betts and others (2017)<sup>58</sup>. Circle radius indicates map size (i.e., number of voxels). We freely share the resulting LC probability map with the neuroscientific community (see Online methods).

After establishing valid models for both memory performance and LC integrity in isolation, we aimed at combining the independent information from both modalities. For this, we merged both SEMs in a unified neuro-cognitive model that demonstrated good fit (RMSEA < 0.06; CFI > 0.95<sup>57</sup>; see Supplemental results and Figure 2). Initial recall (intercept) was positively related to latent LC scores for the older but not the younger group (for older adults:

$\Delta\chi^2 = 7.939$ ,  $\Delta df = 1$ ,  $p = 0.005$ , standardized estimate: 0.35; for younger adults:  $\Delta\chi^2 = 1.181$ ,  $\Delta df = 1$ ,  $p = 0.147^{11}$ ). Learning rates (slope) were not reliably associated with LC scores (all  $\Delta\chi^2 \leq 1.426$ ,  $\Delta df = 1$ , all  $p \geq 0.232$ ). These findings indicate higher initial recall performance (intercept) for older adults with high LC integrity than for those with low LC integrity (see Figure 4).

There were no reliable age group differences in the association between memory performance (intercept, slope) and LC scores (all  $\Delta\chi^2 \leq 1.927$ ,  $\Delta df = 1$ , all  $p \geq 0.165$ ). Thus, while we discovered an association between interindividual differences in memory performance and LC integrity only in older adults, the lack of reliable group differences suggests comparable associations independent of age (see Supplemental results for analyses across age groups).

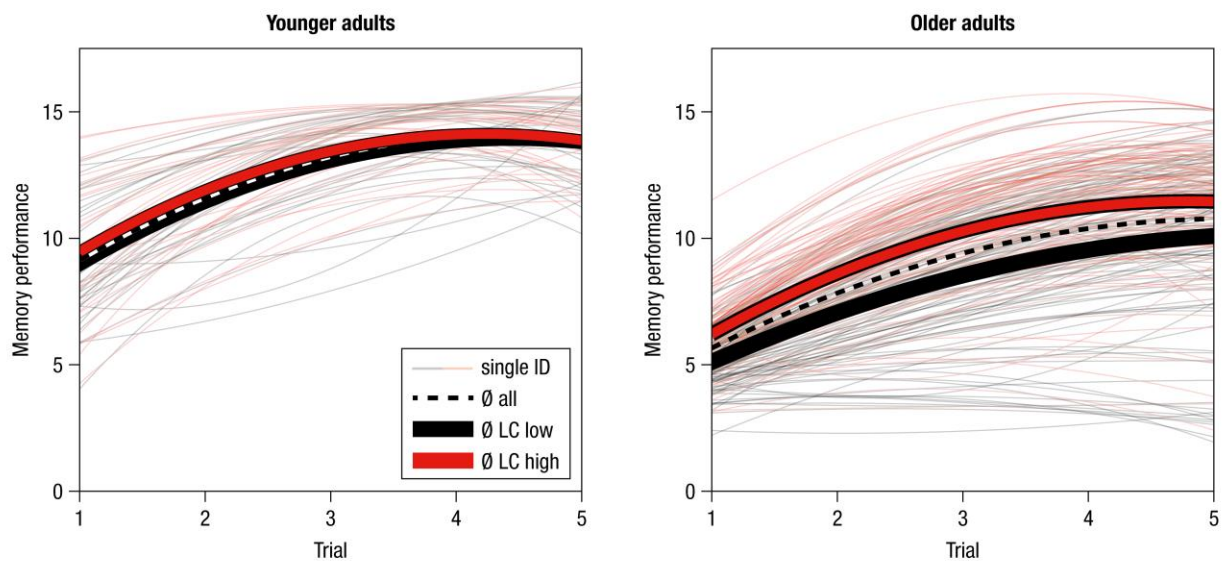

*Figure 4.* Estimated learning and memory performance trajectories for younger (left panel) and older adults (right panel). For visualization of the association between locus coeruleus (LC) integrity and memory performance, single subjects (thin lines) are color-coded based on LC integrity (median-split) and mean trajectories for subgroups are displayed.

### **Reduced age differences in rostral locus coeruleus intensity ratios relate to memory performance in older adults**

Building upon reports of a spatially differentiated LC organization<sup>17-19</sup>, we investigated age differences in LC topography and their association with memory performance by analyzing

LC data slice by slice. A non-parametric cluster-based permutation test<sup>59</sup> (see Online methods) revealed spatially heterogeneous age differences in LC ratios along the rostrocaudal extent of the nucleus. In comparison with younger adults, older adults showed a cluster of elevated intensity spanning caudal slices (65th–100th LC percentile;  $p_{corr} < 0.001$ ) in line with neuromelanin accumulation across the life span<sup>18,42,43</sup>. In contrast, in rostral segments there was even a trend towards decreased LC intensity in older adults (29th–41st LC percentile;  $p_{corr} = 0.079$ ; see Figure 7), in accordance with age-related decline in hippocampus-projecting LC segments<sup>18,19</sup>. To evaluate the functional significance of the observed topographical age differences, we related memory performance to LC ratios across all participants for each identified cluster. In caudal segments (65th–100th LC percentile), LC ratios were not reliably associated with initial recall performance (intercept;  $r_s = -0.08$ ,  $p = 0.172$ ; see Figure 7). However, in rostral segments (29th–41st LC percentile), higher LC ratios were significantly associated with memory performance ( $r_s = 0.207$ ,  $p < 0.001$ ; see Figure 7; difference between caudal and rostral correlations<sup>60</sup>:  $Z = 3.385$ ,  $p < 0.001$ ). Older adults with more youth-like intensity ratios in rostral LC segments also showed better memory performance. In sum, we observed a trend towards spatially confined age differences in LC ratios that were associated with memory performance and are in line with neurodegeneration of hippocampus- and forebrain-projecting LC segments<sup>18</sup> in older adults.

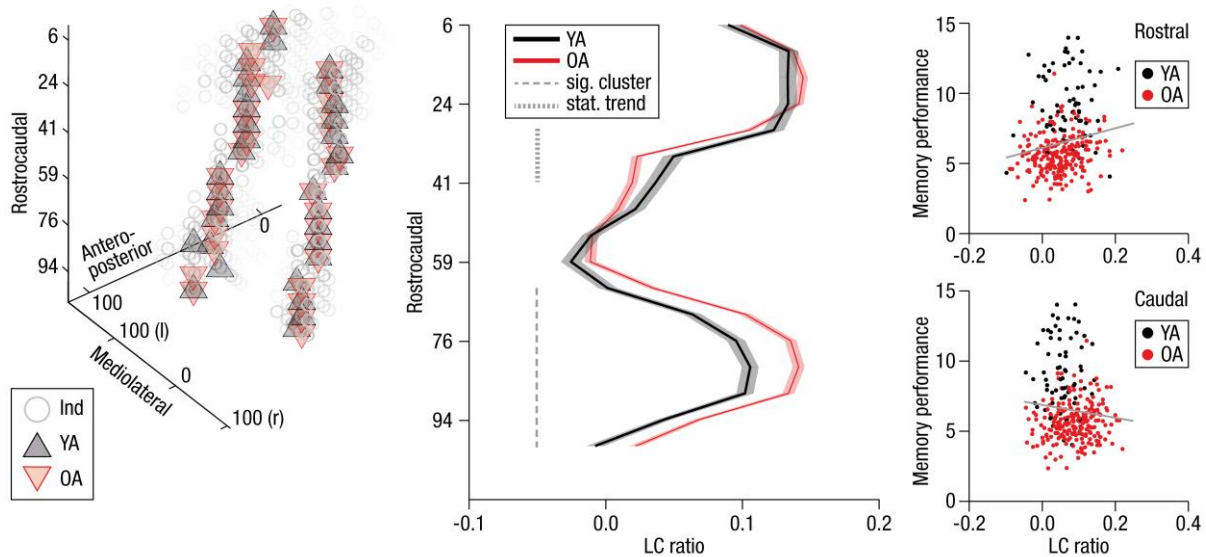

**Figure 5.** Topographical age differences in locus coeruleus intensity ratios and their functional significance. Left plot: On a group level, younger (YA; black) and older adults (OA; red) share highly congruent peak locus coeruleus (LC) locations. Grey circles indicate single subjects (Ind). Middle plot: A cluster-based permutation test revealed spatially confined age differences in LC intensity across the rostrocaudal axis. While older adults show significantly higher ratios in caudal segments, there is a trend for a reversed effect in rostral segments. Shaded lines represent  $\pm 1$  standard error of the mean (SEM; see Figure S12 for the distribution of younger and older adults' LC ratios along the rostrocaudal axis). Rostrocaudal, anteroposterior and mediolateral positions are expressed in percentiles relative to the total size of the observed LC. Right plots: Intensity differences in the rostral but not caudal cluster are associated with memory performance (initial recall) across participants (right plot; rostral:  $r_s = 0.207$ ,  $p < 0.001$ ; caudal:  $r_s = -0.08$ ,  $p = 0.172$ ).

## Discussion

Animal and post-mortem human studies suggest a link between memory performance in aging and the integrity of the central noradrenergic system<sup>7,10</sup>. So far, in vivo research on humans, however, has been stymied by methodological difficulties in the reliable assessment of LC integrity<sup>26,40,41</sup> (but see Hämmerer and colleagues<sup>11</sup>). Here, we took advantage of the paramagnetic properties of neuromelanin, a byproduct of NE synthesis, in T<sub>1</sub>-weighted MRI to image the LC in vivo<sup>46,48</sup>. We assessed learning and memory performance in a large, healthy sample of younger and older adults along with structural MRI markers of LC integrity.

Our findings demonstrate reduced learning and memory performance in older relative to younger adults. Crucially, individual differences in learning and memory in a widely used neuropsychological test of memory functioning and, beyond that, across a variety of alternative memory tasks (see Supplemental results), were positively related to LC integrity in older adults. Moreover, we observed spatially confined age differences in LC intensity ratios. Older adults with more youth-like intensity ratios in rostral, hippocampus-projecting LC segments were better able to preserve memory performance. Making use of the longitudinal nature of this data set (see Online methods), we also examined associations between LC and memory performance using behavioral data that were obtained about 2.2 years before LC measurements were taken. We again observed that higher LC integrity was related to better memory performance among older adults, suggesting stable and lasting rather than short-lived LC–memory dependencies (see Supplemental results). These results bridge a gap between animal and in vivo human research and provide important novel insights into the neural underpinnings of senescent cognitive decline in healthy aging.

We applied an iterative learning and memory task (RAVLT)<sup>61</sup> that required subjects to encode, consolidate, and retrieve verbal information and thus captures the dynamic nature of memory<sup>53</sup>. Our analyses allow the study of two psychologically distinct factors, namely, initial recall (i.e., performance after the first learning trial, corresponding to a standard one-trial memory assessment) and learning (i.e., changes in performance with practice). Age differences were mainly observed in initial recall performance (see Supplemental discussion).

Neurodegenerative changes have been suggested to be determinants of interindividual differences in learning and memory performance in late life<sup>51,62</sup>. Here, we investigated the role of the LC, one of the first targets of neurodegenerative diseases such as Alzheimer's and

Parkinson's, in senescent memory decline<sup>8,9,34</sup>. In particular, we exploited the paramagnetic properties of neuromelanin-metal compounds in T<sub>1</sub>-weighted MRI to index the integrity of the LC in vivo<sup>46</sup> (see <sup>63,64</sup> for recent discussions of LC contrast mechanisms). Neuromelanin accumulates non-linearly in LC cells across life with a peak concentration at around 50–60 years of age and subsequent stable levels<sup>35</sup> or decline, probably due to preferential loss of pigmented cells<sup>42,43</sup>. Thus, neuromelanin forms a reliable natural contrast agent, particularly in older adults, that can be harnessed in cell count<sup>14</sup> and MRI studies<sup>48</sup> to index LC integrity. However, neuromelanin may be a less effective indicator of LC structure in younger adults due to the many LC neurons that do not yet contain neuromelanin, based on post-mortem analyses using tyrosine hydroxylase (i.e., the rate-limiting enzyme in NE synthesis) as a marker of LC neurons<sup>18</sup>. From the fifth decade onwards the numbers of LC neurons identified by tyrosine hydroxylase and neuromelanin markers were similar<sup>18</sup>. We successfully established a semi-automatic procedure that extracted individual LC intensity ratios across the rostrocaudal extent from high-resolution neuromelanin-sensitive brainstem MRI in younger and older adults. In particular, we pooled over aligned scans to facilitate LC delineation at a group level<sup>58</sup>, which in turn was used to restrict automatized extraction of individual peak intensities<sup>64,65</sup>. The LC volume of interest (search space) generated at the group level matches recent histological analyses that reported a dense packing of noradrenergic cells in a thin central LC compartment and dispersion towards rostral and especially caudal extremities<sup>14</sup>. We demonstrated high validity of the proposed semi-automatic procedure by comparisons to both previously published LC maps<sup>41,58</sup> and manual LC intensity ratings (see Supplemental results). Repeated measurements of an independent younger adult sample further confirmed high reproducibility of the intensity assessment (see Supplemental results). However, as reported earlier for neuromelanin-sensitive sequences, our

analyses do not capture the complete LC extent<sup>47,66</sup> leading to lower volume estimates than those obtained post-mortem studies<sup>15</sup>. In their histological analyses, Fernandes and colleagues describe a common, central LC zone which is shared across all subjects<sup>14</sup>. Accordingly, the segments with the most dispersed noradrenergic cells in the caudal LC show less overlap on a group level and are thus arguably more difficult to detect using a semi-automatic approach with a conservative intensity threshold (i.e.,  $4SD$  above mean intensity of a reference region<sup>64,65</sup>). This circumstance is likely exacerbated by partial volume effects due to the relatively thick slices in most neuromelanin-sensitive sequences<sup>66</sup>. However, manual<sup>58</sup> and threshold-free automatic approaches<sup>41</sup> also appear to be affected by this challenge as evident from their low correspondence in caudal slices (MNI  $Z \leq -30$ : 6.91 % of Keren et al. in Betts et al., 4.63 % vice versa<sup>41,58</sup>; see Figure 2d). We thus refrained from attempts to capture the most caudal LC segments via manual segmentation, a lowering of intensity thresholds, or both, in order to effectively separate LC from the nuclei subcoerulei<sup>13</sup>.

To investigate the link between LC integrity and memory in aging humans, we estimated latent LC integrity scores using structural equation modeling. Here, we integrated over slices and hemispheres to derive a single measure reflecting LC integrity. In line with spatially confined age differences<sup>18,41,58</sup>, we observed comparable average LC scores in younger and older adults. In older adults, higher initial recall performance and steeper learning curves were found in subjects with high LC integrity. Even when integrating over a variety of tasks (see Supplemental results), our findings corroborate a positive dependency of memory performance on LC integrity, in line with a general mechanism beyond specific mnemonic domains (e.g., emotional memory<sup>11</sup>).

Besides regulating healthy cognition<sup>17,22,25,27,28</sup> the LC subserves critical neuroprotective functions<sup>34,67,68</sup>. For instance, NE protects against neuroinflammation via the regulation of



inflammatory gene expression and directly enhances clearance of aggregated  $\beta$ -amyloid via activation of microglia<sup>34,68</sup>, two major threats to the aging brain<sup>69</sup>. This led Robertson and colleagues<sup>70</sup> to suggest that repeated activation of the LC-NE system (e.g., by exposure to novelty<sup>33</sup>) helps maintain cognitive functionality in aging despite underlying neuropathological changes. At the same time, the LC is susceptible to neurodegeneration in aging. Its vulnerable anatomical location next to the fourth ventricle exposes it to toxins and its high energy demand increases the risk of oxidative stress over time<sup>67</sup>. Thus, while in aging LC-NE's neuroprotective function is especially important, the loss of noradrenergic cells may have wide-ranging consequences for both cognition and brain health. Whereas we observed a positive association between LC integrity and memory performance in older adults, we did not find a robust relation in younger adults. However, the association between LC integrity and memory did not differ reliably between groups. Thus, while we discovered an association between interindividual differences in memory performance and LC integrity in older but not younger adults, the lack of reliable group differences suggests comparable associations independent of age. This appears to contrast with the notion of an increasingly important role of the LC-NE system in aging<sup>34</sup>. However, to constitute a reliable proxy for neuronal density within the LC<sup>48</sup> neuromelanin-sensitive MRI requires a sufficient neuromelanin-saturation of the nucleus. Post-mortem studies indicate that neuromelanin concentration within the LC peaks around late middle adulthood (~50 years of age<sup>43,71</sup>). Thus, the lower sensitivity of neuromelanin as a LC integrity proxy in younger adults may have impeded finding reliable associations within this subgroup<sup>11</sup> as well as differences between age groups.

We observed spatially confined age differences in LC intensity ratios<sup>41,58</sup>. In older relative to younger adults, caudal LC sections showed significantly elevated intensity ratios in line with

neuromelanin accumulation across the life span<sup>42,43</sup>. In contrast, there was an absence of increased signal in rostral LC and even a tendency towards reduced intensity ratios in older adults. This may suggest neurodegeneration of rostral LC segments that are densely connected to key memory structures like the forebrain and hippocampus<sup>17-19</sup>. Consistent with this possibility, LC intensity ratios in rostral but not caudal segments were positively associated with memory performance. This finding is in line with a series of cell counting studies that point towards specific loss of rostral LC compartments even in healthy aging (for a review of early studies, see<sup>18</sup>, but also see<sup>12,14,35,36</sup> for recent observations of stable LC cell counts in healthy aging and<sup>34</sup> for a recent discussion).

At least three well-documented mechanisms of noradrenergic action may explain the observed general memory-promoting effect of high LC integrity. First, NE release in the sensory cortices increases signal-to-noise ratios by silencing spontaneous activity while sparing or even facilitating stimulus-evoked responses<sup>17,28</sup>, presumably in self-enhancing feedback loops with glutamate<sup>25</sup>. In addition, NE improves the temporal organization of neuronal responses to sensory stimulation (i.e., spike rhythmicity) and thus increases perceptual acuity<sup>28,72,73</sup>. Note that noisier information processing has been linked to deficient neuromodulation with effects on higher-order cognitive functions like attention and working memory<sup>74</sup>. Second, via action on post-synaptic  $\alpha_{2A}$ -adrenoceptors in the prefrontal cortex, moderate levels of NE facilitate delay-related activity, which is considered a cellular analogue of working memory<sup>22</sup>. Accordingly, pharmacological manipulation of NE levels in aged monkeys ameliorated attention and working memory deficits<sup>39</sup>. Hence, LC integrity may promote attentional and control mechanisms implicated in successful episodic memory performance<sup>75</sup>. Third, in the amygdala and hippocampus, NE modulates synaptic strength and facilitates synaptic plasticity<sup>27,28</sup>. More

specifically, via its action on  $\beta$ -adrenoceptors, the LC modulates LTP and LTD, major determinants of long-term memory<sup>29,30</sup>. In sum, NE released from the LC alters perception, attention and memory at multiple cortical and subcortical sides, crucially implicating LC integrity in learning and memory in aging.

Recent analyses of large postmortem samples have indicated that the LC is among the earliest brain regions to show hyperphosphorylated tau, a hallmark of Alzheimer's disease (but see<sup>76</sup> for a different observation and<sup>77</sup> for a commentary), which accumulates in the nucleus linearly with the progression of the disease<sup>8,12,78</sup>. In tauopathies like Alzheimer's, misfolded tau proteins are thought to spread in a stereotypical, transcellular propagation pattern through neural networks<sup>8,76</sup> which may lead to tau pathology in prominent noradrenergic projection targets such as the medial temporal lobe<sup>68</sup>. Elevated tau levels are associated with more aggregated amyloid- $\beta$ , the second hallmark of Alzheimer's disease, and worse cognition<sup>69</sup>. A mere accumulation of subcortical tau could be harmless without evidence for neurodegenerative consequences. However, LC volume decreases by about 8% per Braak stage increment (i.e., a classification system that allows staging the progression of tau spread) followed by death of LC cells (from middle Braak stages on<sup>12,79</sup>) that correlates with cognitive decline (for a review on the impact of hyperphosphorylated tau on LC, see<sup>68</sup>). Of note, LC cell loss in Alzheimer's disease reaches profound levels (~50–80 %<sup>67</sup>) and even surpasses neurodegeneration of the cholinergic nucleus basalis<sup>80</sup>. In animal models of Alzheimer's disease, LC lesions exacerbate both neural and behavioral decline<sup>67</sup>. In particular, in a mouse model of tauopathy, LC-ablated mice showed impaired memory and increased neuronal loss in the hippocampal formation compared with non-ablated animals<sup>68,81,82</sup>. Further, in a rat model with both  $\beta$ -amyloid and tau pathology, chemogenic activation of the LC rescued hippocampus-dependent behavior<sup>79,83</sup>. Together, this

indicates that in Alzheimer's disease LC neurodegeneration acts synergistically with tau pathology to drive pathological changes and does not merely constitute an epiphenomenon<sup>82</sup>. The threshold between healthy aging and early manifestations of neurodegenerative diseases like Alzheimer's is yet to be defined<sup>79</sup>. Most likely, both LC neurodegeneration and the transition from healthy cognition in aging to pathologic conditions (i.e., mild cognitive impairment, dementia) occur along a continuum<sup>84</sup>. While all but two of the older adults tested in this study scored above-threshold on a dementia screening (i.e., Mini Mental State Examination<sup>85</sup>) and demonstrated a high level of functionality, neither our cognitive nor neural data can rule out the existence of early levels of neuropathology (e.g., subcortical accumulation of pretangle tau<sup>8</sup>). We thus cannot rule out that both normal aging and neuropathologic changes affected locus coeruleus integrity in our older adult sample.

The present results underscore the utility of non-invasive, in vivo markers of LC integrity as indicators for preserved memory performance in human aging and extend our knowledge about the role of the LC-NE system in senescent decline. Using non-invasive in vivo MRI, we discovered spatially confined and functionally relevant differences between younger and older adults in those segments of LC that are connected to key memory structures like the hippocampus. Importantly, structural equation modeling revealed reliable and stable positive associations between LC integrity and general episodic memory among older adults. We conclude that older adults with more preserved LC integrity are equipped with more proficient episodic memory. This finding, which needs to be corroborated by long-term longitudinal evidence, adds specificity to the general proposition that brain maintenance is a key feature of successful cognitive aging<sup>1</sup>.

## Online methods

### Study design and participants

Data was collected within the framework of the Berlin Aging Study-II (BASE-II<sup>86–88</sup>). BASE-II is a multi-disciplinary and multi-institutional longitudinal study that investigates the cognitive, neural, physical, and social conditions that are associated with successful aging. For an extensive study description, please refer to the study's website (<https://www.base2.mpg.de/en>) and papers<sup>86–88</sup>.

Cognitive and neuro-imaging data of younger and older participants were collected at the Max Planck Institute for Human Development (Berlin, Germany) at two time points (T1 and T2) between 2013 and 2016. On average, data acquisitions were 2.21 years apart (standard deviation (*SD*) = 0.52, range = 0.9–3.2). Cognitive and neuro-imaging data were collected on separate occasions at each time point (mean interval = 9.16 days, *SD* = 6.32, range = –2–44; for T2). Locus coeruleus (LC) data were acquired only at the T2.

A subset of 323 BASE-II participants underwent magnetic resonance imaging (MRI), with 24 of these excluded before analysis due to missing or incomplete neural (*n* = 19) or cognitive (*n* = 5) data. After visual inspection of brainstem MRI, five additional participants (1.67 %; 0 female; mean age: 76.66 years; *SD* = 1.64; range = 74.93–78.74; at T2) were excluded from further analyses due to excessive movement artifacts (*n* = 2) or incorrect scan positioning (*n* = 3). The final MRI subsample (see Supplemental methods) included 66 younger adults (22 female) with a mean age of 32.5 years (*SD* = 3.53, range = 25.41–39.84; at T2) and 228 older adults (82 female) with a mean age of 72.29 years (*SD* = 4.11; range = 62.53–83.16; at T2).

Neurological and psychiatric disorders, a history of head injuries, or intake of memory-affecting medication precluded inclusion in the study. All eligible participants were MRI-compatible, right-handed, and had normal or corrected-to-normal vision.

The cognitive and MRI assessment were approved by the Ethics Committees of the Max Planck Institute for Human Development and the German Psychological Society (DGPs), respectively. Participants signed written informed consent and received monetary compensation for their participation. All experiments were performed in accordance with relevant guidelines and regulations.

### **Cognitive data assessment**

The baseline cognitive assessment of BASE-II (T1) and its follow-up (T2) included an assessment of working memory, episodic memory and fluid intelligence in small group sessions of about 6 individuals using a computerized battery of 21 tasks (for a description of the complete battery, please refer to<sup>89</sup>). Each test session lasted approximately 3.5 hours. At T1, a second cognitive assessment was scheduled one week after the first session to test for long delayed recall performance.

Our hypotheses focused on the Rey Auditory Verbal Learning Test (RAVLT), a standardized and validated neuropsychological tool that provides information about participants' learning and delayed recall performance<sup>61</sup> (see Figure 1): Subjects first learned a 15-word list that was auditorily presented via headphones. The task was composed of five learning trials each followed by a free recall period in which participants entered the words they remembered via keyboard (trial 1–5; recall of learning list). After initial learning, a 15-word distractor list, containing semantically unrelated words was presented, followed by a free recall phase (trial 6; recall of the distractor items). Next, participants were again asked to freely recall only items

presented in the initial list (trial 7; recall of learning list after distraction). Another free recall test was administered after a delay of 30 minutes (trial 8; delayed recall of learning list). The verbal learning memory task ended with a recognition memory test that included 50 items (learning list: 15, distractor list: 15, similar lures: 20). At T1, participants were re-invited 7 days later for a final long delayed free recall test (trial 9; long delayed recall of learning list). After the initial learning cycles, the correct word list was never re-presented to subjects. The same word list was used at T1 and T2.

Making use of the comprehensive cognitive battery available for this data set, we additionally integrated performance over a variety of episodic memory tasks to retrieve a general measure of episodic memory as previously described<sup>89</sup> while explicitly excluding RAVLT data (see Supplemental results). In particular, we incorporated information of a visual face–profession, object–location, and scene encoding task. For detailed task descriptions, please refer to<sup>89</sup>. In short, the visual face–profession task (FPT) involved subjects studying the 45 pairs of face images and profession words. The tasks consisted of an incidental encoding phase, a 2-minute distraction phase, and finally a recognition memory task including old, new as well as rearranged face–profession pairs. Recognition memory (hits – false alarms) for rearranged pairs was used as the performance index. In the visual object–location memory task (OLT), participants encoded the location of 12 digital photographs of real life objects on a 6 x 6 grid. After encoding, objects reappeared next to the grid and subjects were asked to reproduce the correct location by placing the items in the correct grid position. The sum of correct placements was used as the performance index. Finally, in a visual scene encoding task (IOST), participants incidentally encoded 88 scene images by performing indoor/outdoor judgments on each image. The encoding phase was followed by an old/new recognition memory test which included

confidence judgments. Recognition memory (hits – false alarms) was tested after a delay of approximately 2.5 hours and served as the performance index.

### **Magnetic resonance imaging data assessment**

Structural and functional MRI data were collected on both time points (T1, T2) employing a 3-Tesla Siemens Magnetom Tim Trio Scanner with a standard 12-channel head coil. Only those sequences used in the current analyses are described below.

A three-dimensional T<sub>1</sub>-weighted magnetization prepared gradient-echo (MPRAGE) sequence with a duration of 9.2 min and the following parameters was applied: TR = 2500 ms, TE = 4.770 ms, TI = 1100 ms, flip angle = 7 °, bandwidth = 140 Hz/pixel, acquisition matrix = 256 × 256 × 192, isometric voxel size = 1 mm<sup>3</sup>. Pre-scan normalize and 3D distortion correction options were enabled.

Based on this whole-brain MPRAGE sequence, a neuromelanin-sensitive high-resolution, two-dimensional T<sub>1</sub>-weighted turbo-spin echo (TSE) sequence was aligned perpendicularly to the plane of the respective participant's brainstem. Acquisition of the TSE sequence took 2 × 5.9 min, and the following parameters were used: TR = 600 ms, TE = 11ms, flip angle = 120 °, bandwidth = 287 Hz/pixel, acquisition matrix = 350 × 263 × 350, voxel size = 0.5 × 0.5 × 2.5 mm<sup>3</sup>. Each TSE scan consisted of 10 axial slices with a gap of 20 % between slices, which covered the whole extent of the pons. Pre-scan normalize and elliptical filter options were enabled. The TSE sequence yielded two brainstem MRIs per participant, each resulting from 4 (online) averages.

For some participants, specific absorption rate (SAR) limits were exceeded, which precluded further scanning with the current set of parameters (cf.<sup>47,64</sup>). To avoid data loss while maintaining contrast settings, for those participants the maximal number of TSE slices was



reduced. Thus, our sample consists of the following slice distribution:  $243 \times 10$  slices,  $38 \times 9$  slices,  $27 \times 8$  slices,  $6 \times 7$  slices,  $1 \times 6$  slices,  $3 \times 11$  slices (acquired before adjusting the number of slices in the sequence protocol). TSE scans are available only for T2.

### **Cognitive data analysis**

We applied structural equation modeling (SEM) to analyze inter- and intra-individual differences in verbal learning and memory performance using the  $\Omega$ nyx 1.0-991 software package<sup>90</sup> with full information maximum likelihood estimation (FIML). SEM offers a multivariate approach in which repeatedly observed (manifest) variables can be used to examine hypotheses about unobserved (latent) variables. Latent variables have the benefit of accounting for measurement error in observed scores and thereby increasing statistical power<sup>91,92</sup>. Here, we assumed that younger and older adults recall a gradually increasing number of words over iterative RAVLT learning trials. Formally, this can be expressed as a learning curve consisting of an initial memory performance level (intercept) and a gain over learning trials (slope). Since we hypothesized that the participants' learning performance reaches a natural (or task-induced) performance limit, we expected an increasing yet negatively accelerated slope<sup>53,54</sup>. Using latent growth curve modeling (LGCM, a specific variant of SEM), we estimated the intercept and slope factors on a latent level<sup>56</sup>. To test for differences in intercept and slope parameters between age groups, we opted for a multiple-group model<sup>91,92</sup>. In particular, for each time point we fitted a simple quadratic growth model comprising an intercept as well as quadratic and linear slope factor for each age group (see Figure 3 in Supplemental results). To investigate potential relations between intercept and slope terms (e.g., starting out higher may be related to faster performance increases), we freely estimated covariances between intercept and slope parameters within age groups<sup>55</sup>.

We assessed the adequacy of the proposed growth models by testing for differences between the model-implied and empirically observed covariance matrices<sup>93</sup>. The  $\chi^2$ -test formally tests for equity of the covariance matrices. However, it is particularly sensitive to sample size and should be interpreted with caution in large samples<sup>57,93</sup>. Thus, we examined two additional frequently reported fit indices: First, the root mean square error of approximation (RMSEA) is a closeness of fit coefficient that expresses how much the postulated model approaches the true model. Second, the comparative fit index (CFI) is an incremental fit index which compares the goodness of fit of the proposed model with a more restrictive nested baseline model<sup>57,91,93</sup>. In contrast to the  $\chi^2$ -test, the CFI is not influenced by sample size. RMSEA values close to or below 0.06 and CFI values of close to 0.95 or greater indicate good model fit<sup>57</sup>. Finally, the adequacy of the quadratic growth model was tested against nested competing alternative models (e.g., intercept only and linear growth models) using likelihood ratio difference tests<sup>91,93</sup>. In the case of non-nested competing alternative models, we compared the Akaike Information Criterion (AIC), favoring the model providing the smallest AIC<sup>91</sup>.

After establishing model fit, age differences in parameters of interest (e.g., means and (co)variances of intercept and slope factors) were tested by fixing parameters to equity between groups and comparing model fit to a model in which parameters were freely estimated using a likelihood ratio difference test<sup>91,93</sup>.

In a similar vein, we integrated performance over a variety of memory tasks to estimate a general episodic memory score using a multiple-group single factor structural equation model as previously described<sup>89</sup>(see Figure 4 in Supplemental results). In particular, in each age group performance in the visual face – profession, object – location, and scene encoding tasks served as manifest variables and loaded on a single latent episodic memory factor. Factor loadings (other

than the first, which was fixed to one) were estimated freely but were constrained to be equal across groups. Adequacy of the proposed model was assessed using a  $\chi^2$ -test as well as two additional fit indices (RMSEA, CFI).

### **Magnetic resonance imaging data analysis**

We established a multi-step analysis procedure to extract individual LC intensity values that addressed a series of methodological concerns raised in previous research: First, TSE scans of the LC typically demonstrate a low signal-to-noise ratio due to the high spatial resolution needed to image the small nucleus<sup>64</sup>. In addition, the LC shows amorphous borders, complicating the manual segmentation of the structure<sup>41,66</sup>. Thus, the use of semi-automatic threshold-based approaches was recently suggested to circumvent manual tracing of the nucleus and associated errors as well as potential biases (e.g., non-blinded raters<sup>47,64,65</sup>). Second, a reliable coregistration of brainstem MRI to standard space poses a major methodological challenge with standard software packages that can be addressed by the use of study-specific templates and coregistration masks<sup>41</sup>. Third, age- and disease-related alterations of LC integrity are not homogeneous across the rostrocaudal extent of the structure<sup>9,41,58</sup>. Increased specificity and sensitivity to detect such conditions may be reached by assessing intensity across the whole rostrocaudal axis<sup>47</sup>. Fourth, due to the use of multiple measurements and online averaging, the acquisition time for most neuromelanin-sensitive sequences exceeds 10 minutes, which increases the risk of head motion artifacts and thus reduced data quality<sup>64</sup>. To explicitly correct for this, images from each measurement can be saved separately and averaged after application of motion-correction methods<sup>64</sup>.

In the proposed analysis procedure (see Figure 1 in Supplemental methods), we first pooled across subjects over aligned TSE scans to increase signal-to-noise ratio and facilitate LC

delineation using a template-based approach (cf.<sup>41,58</sup>; Steps 1–3). On a group level, LC location was determined semi-automatically (cf.<sup>64,65</sup>) to restrict fully-automatized extraction of individual peak intensity values across the rostrocaudal extent (Steps 4–5). For each participant, data from two scans (both from T2) were assessed, and extracted values were averaged to obtain a more reliable estimate of LC intensity.

### **Coregistration and standardization of magnetic resonance imaging data**

Prior to analysis, all whole-brain and brainstem MRI scans (MPRAGE, TSE) were up-sampled to twice the initial matrix size by sinc-interpolation to improve visualization of the LC as previously described (cf.<sup>58</sup>).

Initially (Step 1), using Advanced Normalization Tools v. 2.1 (ANTs<sup>94,95</sup>), a group whole-brain template (Template<sub>whole</sub>) was generated from all available MPRAGE scans from T2. In this iterative process, (a) individual native space scans (MPRAGE<sub>native</sub>) were coregistered to a common group or template space and (b) coregistered scans (MPRAGE<sub>template</sub>) were then averaged to form the group whole-brain template. An average of all input files served as an initial fixed image. One linear (rigid, then affine) registration of input files was followed by six non-linear registration iterations. Each non-linear registration was performed over three increasingly fine-grained resolutions ( $30 \times 90 \times 20$  iterations). We applied a N4 bias field correction on moving images before each registration. Cross-correlation (CC) was used as the similarity metric and greedy Symmetric Normalization (SyN) as transformation model for non-linear registrations<sup>96</sup>. Template update steps were set to 0.25 mm.

Next (Step 2), within each subject, we coregistered the native space brainstem scan (TSE<sub>native</sub>) to the whole-brain scan that had been moved to template space (i.e., MPRAGE<sub>template</sub>; see Step 1). For this, we first performed linear (rigid, then affine) followed by nonlinear (SyN)

registration steps<sup>96</sup>. Histogram matching was enabled since we registered scans from the same modality (T<sub>1</sub>-weighted). This intermediate within-subject coregistration was implemented to bring individual brainstem scans to a common (whole-brain) space and thereby correct for differences in acquisition angle that would reduce precision of the template building (see Step 3).

Finally (Step 3), the aligned brainstem scans were fed into a second template building run, resulting in (a) individual brainstem scans coregistered to template space (TSE<sub>template</sub>) and (b) a group brainstem template image (Template<sub>slab</sub>). The same parameters were used for both template building runs (Step 1, Step 3). The linear and non-linear transformation matrices of the intermediate within-subject coregistration (Step 2) and template building (Step 3) were concatenated and applied to the native space brainstem images (TSE<sub>native</sub>) to achieve spatial standardization (TSE<sub>template</sub>) within a single transformation step (cf.<sup>58</sup>). To correct for minor deviations between whole-brain and brainstem template space, we coregistered the two group templates using a linear (rigid, then affine) followed by nonlinear (SyN) registration. Since we registered a whole-brain image and a slab here, a coregistration (or “lesion”) mask was generated that restricted registration to the brainstem, i.e. voxels falling inside the Template<sub>slab</sub> (cf.<sup>41</sup>).

### **Semi-automatic locus coeruleus segmentation and intensity assessment**

Compared to individual scans, the group brainstem template demonstrated a high signal-to-noise ratio and markedly increased intensities in left and right brainstem sections next to the fourth ventricle corresponding to hypothesized LC locations (see Figure 3b). In order to circumvent manual segmentation on the brainstem template, we thresholded the image (Step 4) allowing only the brightest voxels to remain visible using a custom Matlab function (cf.<sup>64,65</sup>; Mathworks Inc., Sherborn, MA, USA). In particular, we applied a data driven approach using a threshold based on the intensity in a dorsal pontine reference region (see below) that effectively

isolated patches of high image intensity next to the fourth ventricle. The threshold was calculated for each template slice that covered the full brainstem ( $n = 31$ ), separately for each hemisphere, as follows:

$$\text{Eq. 1: } T_{LC} = \mu(\text{Ref}) + \sigma(\text{Ref}) \times 4$$

Whereby  $\mu$  and  $\sigma$  specify the mean and standard deviation of the intensity in the pontine reference (Ref) region, respectively.  $T_{LC}$  denotes the resulting intensity threshold. The cut-off of 4 standard deviations above the mean reference intensity was selected on the basis of previous research<sup>64,65</sup> and was confirmed visually as generating a volume that matched prior mapping studies of the LC<sup>41,58</sup>. A lateralized threshold was computed for each slice to counteract previously reported unilateral biases in brainstem signal intensity<sup>58,66</sup> and intensity fluctuations along the rostrocaudal axis. Next, we generated a volume of interest (VOI), subsequently referred to as search space, that included only those areas that survived thresholding. The resulting bilateral LC search space covered 17 slices and included 409 voxels in total (see Figure 3c). In addition to the LC search space, we also defined a larger rectangular dorsal pontine reference search space, spanning  $35 \times 10$  voxels on all 17 slices on which the LC remained visible (5950 voxels). The bilateral LC and reference search spaces were then split at midline to allow for bilateral and lateralized analyses.

To obtain LC intensity ratios for all subjects (Step 5), we masked individual brainstem scans in template space (i.e.,  $TSE_{\text{template}}$ ) with the binarized LC search space. This was first done with a bilateral, followed by unilateral (left, right) search spaces. We thereby restricted the area from which intensity values could be extracted to potential LC coordinates. We then automatically selected the peak (maximal) intensity voxel within each masked scan for each slice and stored the corresponding intensity value and x/y/z coordinates<sup>41</sup>. In the same vein, we

masked individual scans with a binarized reference search space and extracted intensity values and coordinates. LC intensity ratios were then computed for each slice using the following formula<sup>47</sup>:

$$\text{Eq. 2: } LC_{ratio} = \max(LC) - \max(\text{Ref}) / \max(\text{Ref})$$

Whereby LC denotes the intensity of the locus coeruleus and Ref indicates the intensity of the pontine reference region. Finally, for each hemisphere we computed an average LC ratio across all slices, which was used to probe LC–cognition associations in a SEM framework.

### ***Comparison to previously published locus coeruleus masks***

In order to judge the validity of the generated search space, we plotted the retrieved peak intensity coordinates for each subject's left and right LC<sup>41</sup>. The aggregated maximum intensity plot was then converted to express the likelihood to find the LC for any given voxel (i.e., a LC location probability map; cf.<sup>41,66</sup>). We thresholded the image to show only locations that were shared across participants (i.e., the upper 90 percentiles) and spatially standardized the probability map in a two-step procedure. First, we coregistered the whole-brain template (see Step 1) to 0.5 mm iso-voxel MNI space using linear (rigid, then affine), followed by nonlinear (SyN) registration. Since the brainstem template was registered with the whole-brain template (see Step 3), in a second step we were able to apply the transformation matrices ( $\text{Template}_{\text{slab}} \rightarrow \text{Template}_{\text{whole}}$  and  $\text{Template}_{\text{whole}} \rightarrow \text{MNI}_{0.5}$ ) to the LC probability map. In standard space, we calculated the overlap between the probability map and previously published LC masks<sup>41,58</sup>; see Figure 3d and Supplemental results). To facilitate comparability of study results, we freely share the resulting LC probability map with the neuroscientific community (<https://www.mpib-berlin.mpg.de/LC-Map>).

### ***Comparison to manually assessed locus coeruleus intensity***

The vast majority of published studies on MRI that indexed LC integrity used a manual procedure to assess intensity values (for a recent review, see<sup>47</sup>). To demonstrate the validity of the proposed approach, two independent, blinded raters manually assessed LC and reference intensity values for all subjects using a standard procedure<sup>71</sup>. On each axial slice demonstrating increased intensity in anatomically probable LC locations, raters placed three non-overlapping quadratic 1 mm<sup>2</sup> regions of interest (ROIs) in areas in which signal was most evident (cf.<sup>71</sup>). Raters were instructed not to place the ROIs directly adjacent to the fourth ventricle to avoid partial volume effects contaminating the signal (cf.<sup>84</sup>). To measure reference intensity, three rectangular non-overlapping 10 mm<sup>2</sup> ROIs were placed on the same slices in the dorsal pons, centered medially between the left and right LC ROIs (cf.<sup>71</sup>; see Figure 2 in Supplemental methods). Raters additionally indicated the slice with peak signal intensity. Image processing was conducted using the image j software (<https://imagej.nih.gov/>) in a room with constant illumination. Ratings were performed on offline-averaged, non-interpolated brainstem scans in native space. For analyses, the peak intensity for each slice was first determined for LC (left, right) and pons across ROIs, and then peak intensities were averaged across slices. We calculated the consistency of raters using intraclass correlation coefficients (ICC; two-way mixed model with absolute agreement) and then, after demonstrating high accordance, averaged ratings across hemispheres and raters to obtain a single stable intensity estimate per subject (see Supplemental results). Comparisons between manually and automatically assessed LC intensity values (see Step 5) were eventually assessed by means of ICC. For further analyses, we also calculated LC intensity ratios for both hemispheres using Eq. 2 (see Supplemental results).



### ***Reproducibility of semi-automatically assessed locus coeruleus intensity ratios***

In order to judge the temporal stability of the semi-automatic method, we repeatedly scanned a small number of younger adults who were not participating in the study over the course of 1–2 weeks ( $n = 3$ ; 2 female; mean age: 23.667 years;  $SD = 1.578$  years). Subjects were scanned four times resulting in eight brainstem images per participant (see MRI data assessment; 22 scans in total; missing data for  $n = 1$  at the last time point). Data was sinc-interpolated and fed into another template-building procedure as described above (see Steps 1–3). The resulting brainstem template ( $\text{template}_{\text{slab\_reproducibility}}$ ) was coregistered to the study's brainstem template ( $\text{template}_{\text{slab}}$ ) using linear (rigid, then affine) followed by nonlinear (SyN) registration. This process effectively enabled alignment of each participant's scans with the group brainstem template and thus allowed us to use the established search spaces to compute LC intensity ratios as described above. Finally, ICC were calculated for averaged left and right LC ratios to evaluate the stability of the proposed method. Note that we analyzed intensity ratios here since we compared scans acquired at different time points that are subject to overall scanner fluctuations.

### ***Comparison to semi-automatically assessed locus coeruleus intensity in native space***

We additionally extracted individual LC and reference intensity from native space brainstem scans ( $\text{TSE}_{\text{native}}$ ) to confirm that intensity values retrieved from template space ( $\text{TSE}_{\text{template}}$ ) are not an artifact of coregistration and template building (Steps 1–3). For this, we used the concatenated inverse transformation matrices of Steps 2 and 3 to project the search spaces back to individual subjects' coordinates. In order to compare spatial locations of native space values across subjects, however, a common frame of reference was necessary (cf.<sup>58</sup>). Therefore, before warping, we split the LC and reference search spaces into segments. Each but the most caudal segment contained three slices, reflecting the resolution difference between

native and template space (i.e.,  $1 \times \text{TSE}_{\text{native}} : 3 \times \text{TSE}_{\text{template}}$ ; 1.5 mm : 0.5 mm). The six resulting segments were separately transformed to native space. We then masked native space scans ( $\text{TSE}_{\text{native}}$ ) with binarized LC and reference (segment) search spaces and assessed peak intensities as described above (cf. Step 5). The two native space brainstem images of each participant (see MRI data assessment) were linearly and non-linearly coregistered before masking. To judge the correspondence between automatically assessed LC intensity values from native and template space, we calculated ICC. For further analyses of native space values, we computed LC intensity ratios for both hemispheres as described above using Eq. 2 (see Supplemental results).

### **Analysis of age differences in the spatial distribution of locus coeruleus ratios**

To investigate age differences in LC intensity ratios along the rostrocaudal extent of the nucleus<sup>9,18,41,58</sup>, we calculated non-parametric, cluster-based, random permutation tests as implemented in the Fieldtrip toolbox. These effectively control the false alarm rate in case of multiple testing<sup>59</sup>. In short, first a two-sided, independent samples  $t$ -test is calculated for each slice. Neighboring slices with a  $p$ -value below 0.05 were grouped with spatially adjacent slices to form a cluster. The sum of all  $t$ -values within a cluster formed the respective test statistic. A reference distribution for the summed cluster-level  $t$ -values was computed via the Monte Carlo method. Specifically, in each of 100,000 repetitions, group membership was randomly assigned, a  $t$ -test computed, and the  $t$ -value summed for each cluster. Observed clusters whose test statistic exceeded the 97.5th percentile for its respective reference probability distribution were considered significant<sup>59</sup>. Cluster permutation tests were calculated first across hemispheres and then separately for each hemisphere on LC ratios assessed from template ( $\text{TSE}_{\text{template}}$ ) and native space ( $\text{TSE}_{\text{native}}$ ; see Supplemental results). Here, we used a two-sided test with a significance

level ( $\alpha$ ) of 0.025. In the following, we thus report the doubled cluster  $p$ -values to facilitate readability (i.e.,  $p \leq 0.05$  is considered significant for all statistics).

To evaluate the functional significance of identified topographical age differences, we investigated the association between memory performance and LC ratios in the obtained clusters, irrespective of age group. In particular, for each cluster, the relation between initial recall performance (intercept) and LC ratios (average over slices within the identified cluster) was assessed by means of Spearman's rank correlations.

Finally, to examine inter-hemispheric differences in LC ratios<sup>58,66</sup>, we additionally computed related-samples Wilcoxon signed rank tests. We first calculated a statistic across age groups, which we then followed up by analyses within each age group.

#### **Estimation of latent locus coeruleus integrity scores**

As done for the cognitive data, we applied SEM to analyze interindividual differences in LC ratios. We generated a multiple-group model including average LC ratios of each hemisphere as observed variables (see Step 5; see Figure 6 in Supplemental results). In each group, the two observed variables loaded on a single latent LC integrity factor. Factor loadings (other than the first, which was fixed to one) were estimated freely but were constrained to be equal across groups. Adequacy of the proposed model was assessed using a  $\chi^2$ -test as well as two additional fit indices (RMSEA, CFI). The analyses were first completed with automatically assessed LC ratios ( $TSE_{\text{template}}$ ). To demonstrate the stability of the findings, we repeated the same steps with values assessed in native space ( $TSE_{\text{native}}$ ) and manually assessed intensity ratios. Qualitatively similar results were obtained (see Supplemental results).

### **Analysis of associations between locus coeruleus integrity scores and memory performance**

After generating structural equation models for our cognitive and neural measures, respectively, we set out to link these modalities. That is, we were interested in assessing the relation between interindividual as well as intra-individual differences in verbal learning and memory performance and interindividual differences in LC scores. For this, we first built a unified model merging the verbal learning and LC models described above for each time point (see Figure 2). We investigated associations between our performance and LC measures by allowing for freely estimated covariances on a latent level (shown in black, Figure 2). Models were estimated using LC ratios assessed in template space ( $TSE_{\text{template}}$ ). To assess the stability of the obtained findings, the same analyses were repeated with LC ratios assessed in native space ( $TSE_{\text{native}}$ ) and manually assessed LC ratios (see above). Qualitatively similar results were derived (see Supplemental results). In order to evaluate the generalizability of the expected LC–memory association, we repeated the analyses, this time merging the neural SEM with the general episodic memory SEM (see *Cognitive data analysis* and Figure 5).

Next, to explore change in cognition over time and its relation to neural indices, we combined the LC–verbal learning models of both time points (T1 and T2) in a latent change score model<sup>55,92</sup> (see Figure 10 in Supplemental results). As only cognitive performance was assessed at both time points, we calculated a univariate (multiple indicator) latent change score model. In this, we estimated the change in latent intercept and slope factors on a second order latent level, expressed by  $\Delta$ -intercept and  $\Delta$ -slope factors. Since the same word list was tested in all learning trials in the verbal learning memory task and an identical list was used at T1 and T2, we did not include residual covariances of error terms across time points or correlated errors (cf. <sup>92</sup>). This model allows conclusions about the average rate of change in cognition for each age

group (mean  $\Delta$ -\*) as well as about the within-group variance in change (variance  $\Delta$ -\*;<sup>92</sup>). The association between the cognitive latent change scores and the latent neural variables was assessed by means of freely estimated covariances. As before, model fit for all described models was determined using a  $\chi^2$ -test in combination with two additional fit indices (RMSEA, CFI; see Supplemental results).

### **Statistical parameters**

All reported results are based on two-sided statistical tests. When indicated, tests were adjusted for multiple comparisons. The applied statistical tests did not include covariates, unless noted differently.

### **Code availability**

The custom code used for these analyses is available from the corresponding authors upon request.

### **Data availability**

The data that our results are based on are available from the [BASE-II steering committee](#) upon approved research proposal. For inquiries please contact Dr. Katrin Schaar, BASE-II project coordinator, [schaar@mpib-berlin.mpg.de](mailto:schaar@mpib-berlin.mpg.de). To facilitate comparability of study results, we freely share the established LC probability map with the neuroscientific community (<https://www.mpib-berlin.mpg.de/LC-Map>).

### **Competing interests**

The authors declare no competing interests.

### **Author contributions**

UL and SK designed the broader BASE-II study; MJD, MWB, MM, SK, and NCB designed the additional LC component; SD performed the experiments; MJD and MWB

analyzed the data; MJD and MWB wrote the manuscript; UL, SK, MM, SD, and NCB gave conceptual advice. All authors revised the manuscript.

## References

1. Nyberg, L., Lövdén, M., Riklund, K., Lindenberger, U. & Bäckman, L. Memory aging and brain maintenance. *Trends Cogn. Sci.* **16**, 292–305 (2012).
2. Crook, T. *et al.* Age-associated memory impairment: Proposed diagnostic criteria and measures of clinical change—Report of a National Institute of Mental Health Work Group. *Dev. Neuropsychol.* **2**, 261–276 (1986).
3. Prince, M. J. *et al.* *World Alzheimer Report 2015 - The global impact of dementia: An analysis of prevalence, incidence, cost and trends.* (Alzheimer's Disease International, 2015).
4. Nyberg, L. *et al.* Dopamine D2 receptor availability is linked to hippocampal–caudate functional connectivity and episodic memory. *Proc. Natl. Acad. Sci. U. S. A.* **113**, 7918–7923 (2016).
5. Fandakova, Y., Lindenberger, U. & Shing, Y. L. Deficits in process-specific prefrontal and hippocampal activations contribute to adult age differences in episodic memory interference. *Cereb. Cortex* **24**, 1832–1844 (2014).
6. Lindenberger, U. Human cognitive aging: Corriger la fortune? *Science (80-. )*. **346**, 572–578 (2014).
7. Leslie, F. M. *et al.* Noradrenergic changes and memory loss in aged mice. *Brain Res.* **359**, 292–299 (1985).
8. Braak, H., Thal, D. R., Ghebremedhin, E. & Del Tredici, K. Stages of the pathologic process in Alzheimer disease: Age categories from 1 to 100 years. *J. Neuropathol. Exp. Neurol.* **70**, 960–969 (2011).
9. Marien, M. R., Colpaert, F. C. & Rosenquist, A. C. Noradrenergic mechanisms in

- neurodegenerative diseases: A theory. *Brain Res. Rev.* **45**, 38–78 (2004).
10. Wilson, R. S. *et al.* Neural reserve, neuronal density in the locus ceruleus, and cognitive decline. *Neurology* **80**, 1202–1208 (2013).
  11. Hämmerer, D. *et al.* Locus coeruleus integrity in old age is selectively related to memories linked with salient negative events. *Proc. Natl. Acad. Sci. U. S. A.* **115**, 2228–2233 (2018).
  12. Theofilas, P. *et al.* Locus coeruleus volume and cell population changes during Alzheimer’s disease progression: A stereological study in human postmortem brains with potential implication for early-stage biomarker discovery. *Alzheimer’s Dement.* **13**, 236–246 (2017).
  13. Szabadi, E. Functional neuroanatomy of the central noradrenergic system. *J. Psychopharmacol.* **27**, 659–693 (2013).
  14. Fernandes, P., Regala, J., Correia, F. & Gonçalves-Ferreira, A. J. The human locus coeruleus 3-D stereotactic anatomy. *Surg. Radiol. Anat.* **34**, 879–885 (2012).
  15. German, D. C. *et al.* The human locus coeruleus: Computer reconstruction of cellular distribution. *J. Neurosci.* **8**, 1776–1788 (1988).
  16. Aston-Jones, G. & Waterhouse, B. Locus coeruleus: From global projection system to adaptive regulation of behavior. *Brain Res.* **1645**, 75–78 (2016).
  17. Berridge, C. W. & Waterhouse, B. D. The locus coeruleus-noradrenergic system: Modulation of behavioral state and state-dependent cognitive processes. *Brain Res. Rev.* **42**, 33–84 (2003).
  18. Manaye, K. F., McIntire, D. D., Mann, D. M. A. & German, D. C. Locus coeruleus cell loss in the aging human brain: A non-random process. *J. Comp. Neurol.* **358**, 79–87 (1995).



19. Schwarz, L. A. & Luo, L. Organization of the locus coeruleus-norepinephrine system. *Curr. Biol.* **25**, R1051–R1056 (2015).
20. Waterhouse, B. D. & Chandler, D. J. Heterogeneous organization and function of the central noradrenergic system. *Brain Res.* **1641**, v–x (2016).
21. Ordway, G. A., Schwartz, M. A. & Frazer, A. *Brain norepinephrine: Neurobiology and therapeutics*. (Cambridge University Press, 2007). doi:10.1017/CBO9780511544156
22. Arnsten, A. F. T. & Li, B. M. Neurobiology of executive functions: Catecholamine influences on prefrontal cortical functions. *Biol. Psychiatry* **57**, 1377–1384 (2005).
23. Aston-Jones, G. & Cohen, J. D. An integrative theory of locus coeruleus-norepinephrine function: Adaptive gain and optimal performance. *Annu. Rev. Neurosci.* **28**, 403–450 (2005).
24. Bouret, S. & Sara, S. J. Network reset: A simplified overarching theory of locus coeruleus noradrenaline function. *Trends Neurosci.* **28**, 574–582 (2005).
25. Mather, M., Clewett, D., Sakaki, M. & Harley, C. W. Norepinephrine ignites local hotspots of neuronal excitation: How arousal amplifies selectivity in perception and memory. *Behav. Brain Sci.* **39**, (2016).
26. Nieuwenhuis, S. & Jepma, M. Investigating the role of the noradrenergic system in human cognition. in *Decision making, affect, and learning: Attention and performance XXIII* (eds. Delgado, M., Phelps, E. & Robbins, T.) 367–386 (Oxford University Press, 2011). doi:10.1093/acprof:oso/9780199600434.003.0017
27. Sara, S. J. Locus coeruleus in time with the making of memories. *Curr. Opin. Neurobiol.* **35**, 87–94 (2015).
28. Sara, S. J. The locus coeruleus and noradrenergic modulation of cognition. *Nat. Rev.*

- Neurosci.* **10**, 211–223 (2009).
29. Hansen, N. The longevity of hippocampus-dependent memory is orchestrated by the locus coeruleus-noradrenergic system. *Neural Plast.* **2017**, (2017).
  30. O'Dell, T. J., Connor, S. A., Guglietta, R. & Nguyen, P. V.  $\beta$ -Adrenergic receptor signaling and modulation of long-term potentiation in the mammalian hippocampus. *Learn. Mem.* **22**, 461–471 (2015).
  31. Bray, N. Learning and memory: You only learn once. *Nat. Rev. Neurosci.* **19**, 59 (2018).
  32. McNamara, C. G. & Dupret, D. Two sources of dopamine for the hippocampus. *Trends Neurosci.* **40**, 383–384 (2017).
  33. Takeuchi, T. *et al.* Locus coeruleus and dopaminergic consolidation of everyday memory. *Nature* **537**, 357–362 (2016).
  34. Mather, M. & Harley, C. W. The locus coeruleus: Essential for maintaining cognitive function and the aging brain. *Trends Cogn. Sci.* **20**, 214–226 (2016).
  35. Ohm, T. G., Busch, C. & Bohl, J. Unbiased estimation of neuronal numbers in the human nucleus coeruleus during aging. *Neurobiol. Aging* **18**, 393–399 (1997).
  36. Mouton, P. R., Pakkenberg, B., Gundersen, H. J. G. & Price, D. L. Absolute number and size of pigmented locus coeruleus neurons in young and aged individuals. *J. Chem. Neuroanat.* **7**, 185–190 (1994).
  37. Mei, Y. *et al.* Aging-associated formaldehyde-induced norepinephrine deficiency contributes to age-related memory decline. *Aging Cell* **19**, 659–668 (2015).
  38. Luo, Y. *et al.* Reversal of aging-related emotional memory deficits by norepinephrine via regulating the stability of surface AMPA receptors. *Aging Cell* **14**, 170–179 (2015).
  39. Arnsten, A. F. T. & Goldman-Rakic, P. S. Alpha 2-adrenergic mechanisms in prefrontal

- cortex associated with cognitive decline in aged nonhuman primates. *Science* **230**, 1273–1276 (1985).
40. Astafiev, S. V., Snyder, A. Z., Shulman, G. L. & Corbetta, M. Comment on ‘Modafinil shifts human locus coeruleus to low-tonic, high-phasic activity during functional MRI’ and ‘Homeostatic sleep pressure and responses to sustained attention in the suprachiasmatic area’. *Science* (80-. ). **328**, 309 (2010).
41. Keren, N. I., Lozar, C. T., Harris, K. C., Morgan, P. S. & Eckert, M. A. In vivo mapping of the human locus coeruleus. *Neuroimage* **47**, 1261–1267 (2009).
42. Zecca, L. *et al.* The role of iron and copper molecules in the neuronal vulnerability of locus coeruleus and substantia nigra during aging. *Proc. Natl. Acad. Sci. U. S. A.* **101**, 9843–9848 (2004).
43. Mann, D. M. A. & Yates, P. O. Lipoprotein pigments—their relationship to ageing in the human nervous system. II. The melanin content of pigmented nerve cells. *Brain* **97**, 489–498 (1974).
44. Marcyniuk, B., Mann, D. M. A. & Yates, P. O. The topography of nerve cell loss from the locus caeruleus in elderly persons. *Neurobiol. Aging* **10**, 5–9 (1989).
45. Sasaki, M., Shibata, E., Kudo, K. & Tohyama, K. Neuromelanin-sensitive MRI: Basics, technique, and clinical applications. *Clin. Neuroradiol.* **18**, 147–153 (2008).
46. Sasaki, M. *et al.* Neuromelanin magnetic resonance imaging of locus ceruleus and substantia nigra in Parkinson’s disease. *Neuroreport* **17**, 1215–1218 (2006).
47. Liu, K. Y. *et al.* Magnetic resonance imaging of the human locus coeruleus: A systematic review. *Neurosci. Biobehav. Rev.* **83**, 325–355 (2017).
48. Keren, N. I. *et al.* Histologic validation of locus coeruleus MRI contrast in post-mortem

- tissue. *Neuroimage* **113**, 235–245 (2015).
49. Albert, M. S., Moss, M. B., Tanzi, R. & Jones, K. Preclinical prediction of AD using neuropsychological tests. *J. Int. Neuropsychol. Soc.* **7**, 631–639 (2001).
50. Belleville, S., Fouquet, C., Hudon, C., Zomahoun, H. T. V. & Croteau, J. Neuropsychological measures that predict progression from mild cognitive impairment to Alzheimer’s type dementia in older adults: A systematic review and meta-analysis. *Neuropsychol. Rev.* **27**, 328–353 (2017).
51. Moradi, E., Hallikainen, I., Hänninen, T. & Tohka, J. Rey’s Auditory Verbal Learning Test scores can be predicted from whole brain MRI in Alzheimer’s disease. *NeuroImage Clin.* **13**, 415–427 (2017).
52. Schoenberg, M. R. *et al.* Test performance and classification statistics for the Rey Auditory Verbal Learning Test in selected clinical samples. *Arch. Clin. Neuropsychol.* **21**, 693–703 (2006).
53. Zimprich, D., Rast, P. & Martin, M. Individual differences in verbal learning in old age. in *Handbook of cognitive aging: Interdisciplinary perspectives* (eds. Hofer, S. & Alwin, D.) 224–243 (SAGE Publications, 2008). doi:10.4135/9781412976589.n14
54. Jones, R. N. *et al.* A growth curve model of learning acquisition among cognitively normal older adults. *Exp. Aging Res.* **31**, 291–312 (2005).
55. Zimprich, D. & Rast, P. Verbal learning changes in older adults across 18 months. *Neuropsychol. Dev. Cogn. B. Aging. Neuropsychol. Cogn.* **16**, 461–484 (2009).
56. McArdle, J. J. Dynamic but structural equation modeling of repeated measures data. in *Handbook of multivariate experimental psychology* (eds. Nesselroade, J. R. & Cattell, R. B.) 561–614 (Springer, 1988). doi:10.1007/978-1-4613-0893-5\_17

57. Brown, T. A. *Confirmatory factor analysis for applied research*. New York: Guilford Press (2006).
58. Betts, M. J., Cardenas-Blanco, A., Kanowski, M., Jessen, F. & Düzel, E. In vivo MRI assessment of the human locus coeruleus along its rostrocaudal extent in young and older adults. *Neuroimage* **163**, 150–159 (2017).
59. Maris, E. & Oostenveld, R. Nonparametric statistical testing of EEG- and MEG-data. *J. Neurosci. Methods* **164**, 177–190 (2007).
60. Steiger, J. H. Tests for comparing elements of a correlation matrix. *Psychol. Bull.* **87**, 245–251 (1980).
61. Schmidt, M. *Rey Auditory Verbal Learning Test: A handbook*. (Western Psychological Services, 2004).
62. Gifford, K. A. *et al.* Associations between Verbal Learning Slope and Neuroimaging Markers across the Cognitive Aging Spectrum. *J. Int. Neuropsychol. Soc.* **21**, 455–467 (2015).
63. Priovoulos, N. *et al.* High-resolution in vivo imaging of human locus coeruleus by magnetization transfer MRI at 3T and 7T. *Neuroimage* **168**, 127–136 (2017).
64. Chen, X. *et al.* Simultaneous imaging of locus coeruleus and substantia nigra with a quantitative neuromelanin MRI approach. *Magn. Reson. Imaging* **32**, 1301–1306 (2014).
65. Langley, J., Huddleston, D. E., Liu, C. J. & Hu, X. Reproducibility of locus coeruleus and substantia nigra imaging with neuromelanin sensitive MRI. *Magn. Reson. Mater. Physics, Biol. Med.* **30**, 121–125 (2017).
66. Tona, K. D. *et al.* In vivo visualization of the locus coeruleus in humans: Quantifying the test–retest reliability. *Brain Struct. Funct.* **222**, 4203–4217 (2017).

67. Weinshenker, D. Long road to ruin: Noradrenergic dysfunction in neurodegenerative disease. *Trends Neurosci.* **41**, 211–223 (2018).
68. Chalermplanupap, T., Weinshenker, D. & Rorabaugh, J. M. Down but not out: The consequences of pretangle tau in the locus coeruleus. *Neural Plast.* **2017**, (2017).
69. Jagust, W. Imaging the evolution and pathophysiology of Alzheimer disease. *Nat. Rev. Neurosci.* **1** (2018). doi:10.1038/s41583-018-0067-3
70. Robertson, I. H. A noradrenergic theory of cognitive reserve: Implications for Alzheimer's disease. *Neurobiol. Aging* **34**, 298–308 (2013).
71. Shibata, E. *et al.* Age-related changes in locus coeruleus on neuromelanin magnetic resonance imaging at 3 Tesla. *Magn. Reson. Med. Sci.* **5**, 197–200 (2006).
72. Bouret, S. & Sara, S. J. Locus coeruleus activation modulates firing rate and temporal organization of odour-induced single-cell responses in rat piriform cortex. *Eur. J. Neurosci.* **16**, 2371–2382 (2002).
73. Fries, P. A mechanism for cognitive dynamics: Neuronal communication through neuronal coherence. *Trends Cogn. Sci.* **9**, 474–480 (2005).
74. Li, S.-C., Lindenberger, U. & Sikstrom, S. Aging cognition: From neuromodulation to representation. *Trends Cogn. Sci.* **5**, 479–486 (2001).
75. Shing, Y. L. *et al.* Episodic memory across the lifespan: The contributions of associative and strategic components. *Neurosci. Biobehav. Rev.* **34**, 1080–1091 (2010).
76. Kaufman, S. K., Del Tredici, K., Thomas, T. L., Braak, H. & Diamond, M. I. Tau seeding activity begins in the transentorhinal/entorhinal regions and anticipates phospho-tau pathology in Alzheimer's disease and PART. *Acta Neuropathol.* **136**, 57 (2018).
77. Heinsen, H. & Grinberg, L. T. On the origin of tau seeding activity in Alzheimer's disease.

- Acta Neuropathol.* 1–3 (2018). doi:10.1007/s00401-018-1890-3
78. Ehrenberg, A. J. *et al.* Quantifying the accretion of hyperphosphorylated tau in the locus coeruleus and dorsal raphe nucleus: the pathological building blocks of early Alzheimer’s disease. *Neuropathol. Appl. Neurobiol.* **43**, 393–408 (2017).
79. Grinberg, L. T. & Heinsen, H. Light at the beginning of the tunnel? Investigating early mechanistic changes in Alzheimer’s disease. *Brain* **140**, 2770–2773 (2017).
80. Zarow, C., Lyness, S. A., Mortimer, J. A. & Chui, H. C. Neuronal loss is greater in the locus coeruleus than nucleus basalis and substantia nigra in Alzheimer and Parkinson diseases. *Arch. Neurol.* **60**, 337 (2003).
81. Chalermphanupap, T. *et al.* Locus coeruleus ablation exacerbates cognitive deficits, neuropathology, and lethality in P301S tau transgenic mice. *J. Neurosci.* **38**, 74–92 (2018).
82. Betts, M. J., Ehrenberg, A. J., Hämmerer, D. & Düzel, E. Commentary: Locus coeruleus ablation exacerbates cognitive deficits, neuropathology, and lethality in P301S tau transgenic mice. *Front. Neurosci.* **12**, (2018).
83. Rorabaugh, J. M. *et al.* Chemogenetic locus coeruleus activation restores reversal learning in a rat model of Alzheimer’s disease. *Brain* **140**, 3023–3038 (2017).
84. Clewett, D. V. *et al.* Neuromelanin marks the spot: Identifying a locus coeruleus biomarker of cognitive reserve in healthy aging. *Neurobiol. Aging* **37**, 117–126 (2016).
85. Folstein, M. F., Folstein, S. E. & McHugh, P. R. ‘Mini-mental state’. A practical method for grading the cognitive state of patients for the clinician. *J. Psychiatr. Res.* **12**, 189–198 (1975).
86. Delius, J. A. M., Düzel, S., Gerstorff, D. & Lindenberger, U. Berlin Aging Studies (BASE and BASE-II). in *Encyclopedia of geropsychology* (ed. Pachana, N. A.) 386–395

- (Springer, 2015). doi:10.1007/978-981-287-080-3\_44-1
87. Gerstorf, D. *et al.* *The Berlin Aging Study II – An overview.* *Gerontology* **62**, (2016).
  88. Bertram, L. *et al.* Cohort profile: The Berlin Aging Study II (BASE-II). *Int. J. Epidemiol.* **43**, 703–712 (2014).
  89. Düzel, S. *et al.* Supplementary material for: The Subjective Health Horizon Questionnaire (SHH-Q): Assessing future time perspectives for facets of an active lifestyle. *Gerontology* **62**, 345–353 (2016).
  90. von Oertzen, T., Brandmaier, A. M. & Tsang, S. Structural equation modeling with  $\Omega$ nyx. *Struct. Equ. Model.* **22**, 148–161 (2015).
  91. Curran, P. J., Obeidat, K. & Losardo, D. Twelve frequently asked questions about growth curve modeling. *J. Cogn. Dev.* **11**, 121–136 (2010).
  92. Kievit, R. A. *et al.* Developmental cognitive neuroscience using latent change score models: A tutorial and applications. *Dev. Cogn. Neurosci.* (2017).  
doi:10.1016/j.dcn.2017.11.007
  93. Eid, M., Gollwitzer, M. & Schmitt, M. *Statistik und Forschungsmethoden: Lehrbuch. Grundlagen Psychologie* (Beltz, 2015).
  94. Avants, B. B. *et al.* A reproducible evaluation of ANTs similarity metric performance in brain image registration. *Neuroimage* **54**, 2033–2044 (2011).
  95. Avants, B. B., Tustison, N. & Song, G. Advanced Normalization Tools: V1.0. *Insight J.* **2**, 1–35 (2009).
  96. Klein, A. *et al.* Evaluation of 14 nonlinear deformation algorithms applied to human brain MRI registration. *Neuroimage* **46**, 786–802 (2009).
